# Supplementary material for: Selective and confined growth of transition metal dichalcogenides on transferred graphene
Source: Royal Society of Chemistry journal article supplement (doi:10.1039/c7ra07772f), 2017-01-01
Supplement: c7ra07772f1.pdf [file c7ra07772f1.pdf]

Supplementary Information for  
Selective and confined growth of transition metal  
dichalcogenides on transferred graphene

Fei Lu, Arka Karmakar, Simran Shahi, and Erik Einarsson

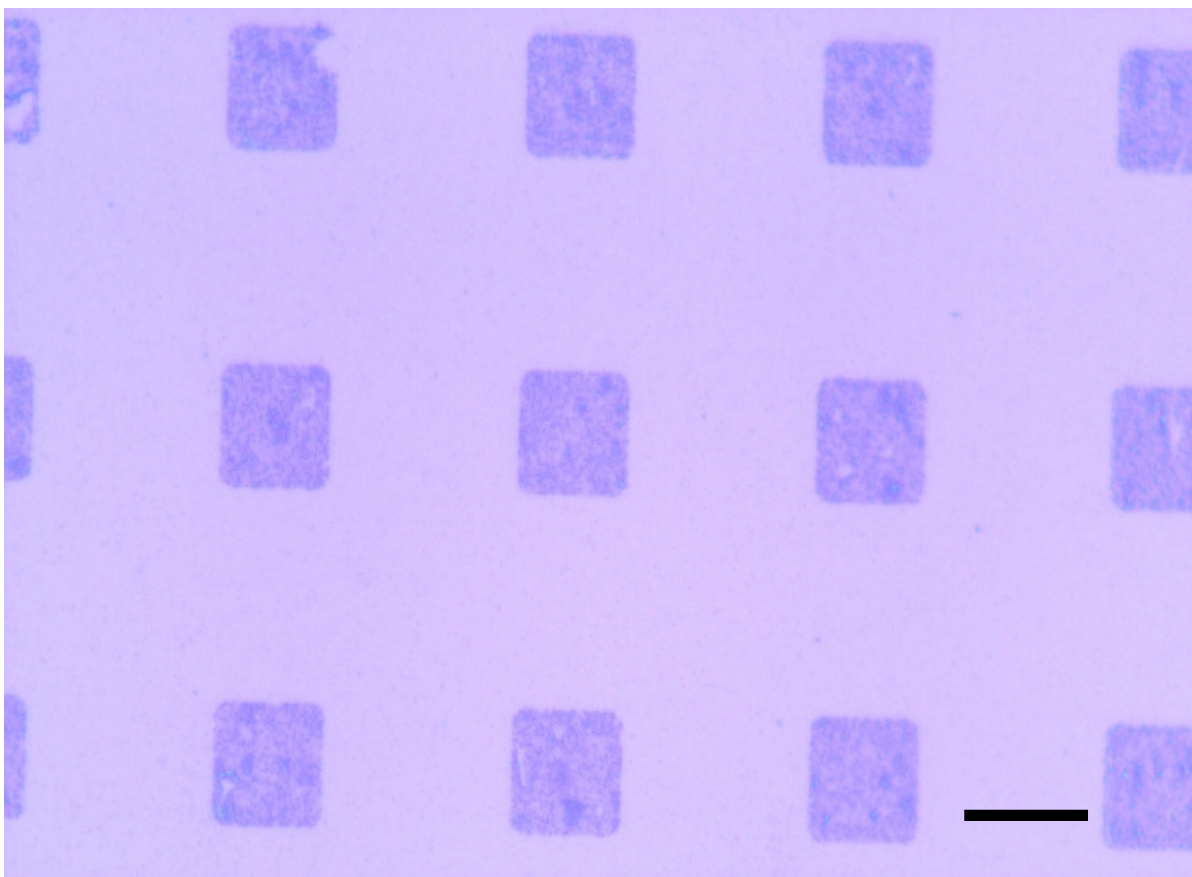

Figure S1: Additional optical micrograph of MoS<sub>2</sub> on patterned graphene. Scale bar corresponds to 20  $\mu\text{m}$ .

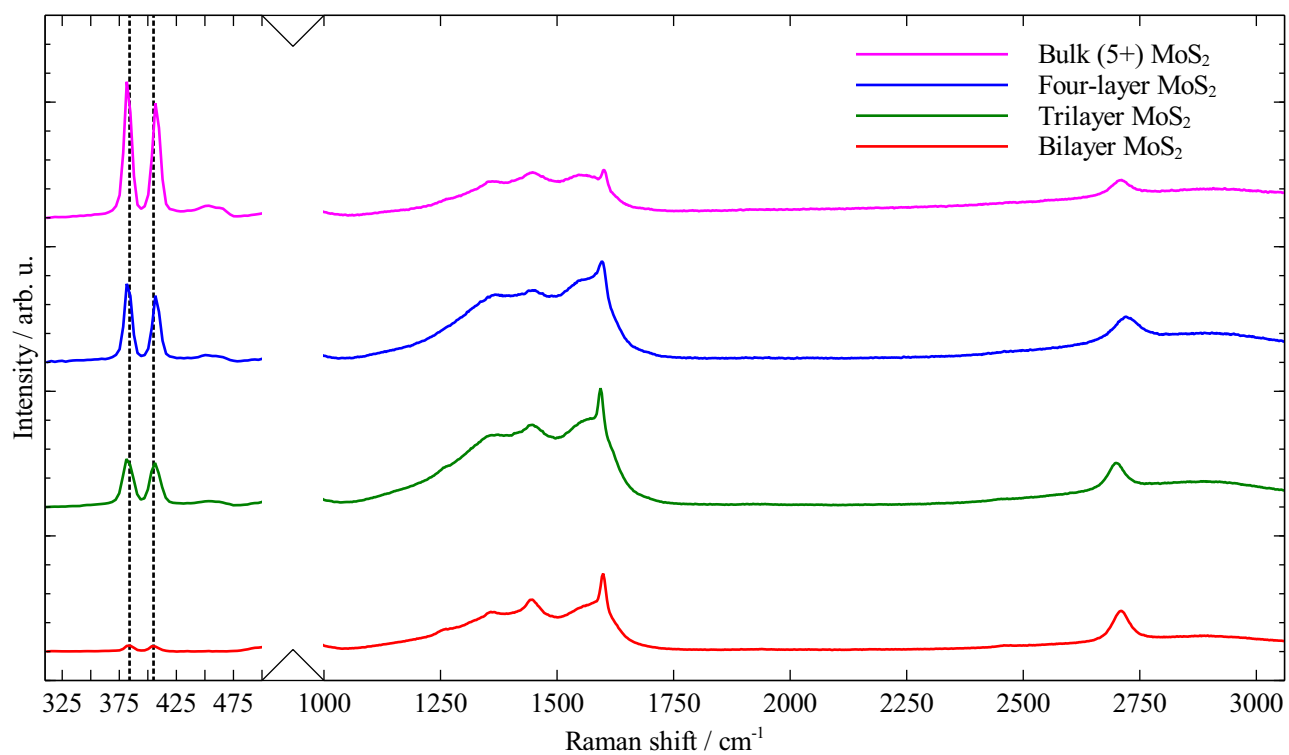

Figure S2: Raman spectrum of MoS<sub>2</sub> on graphene ranging from bilayer to bulk (5+ layers).

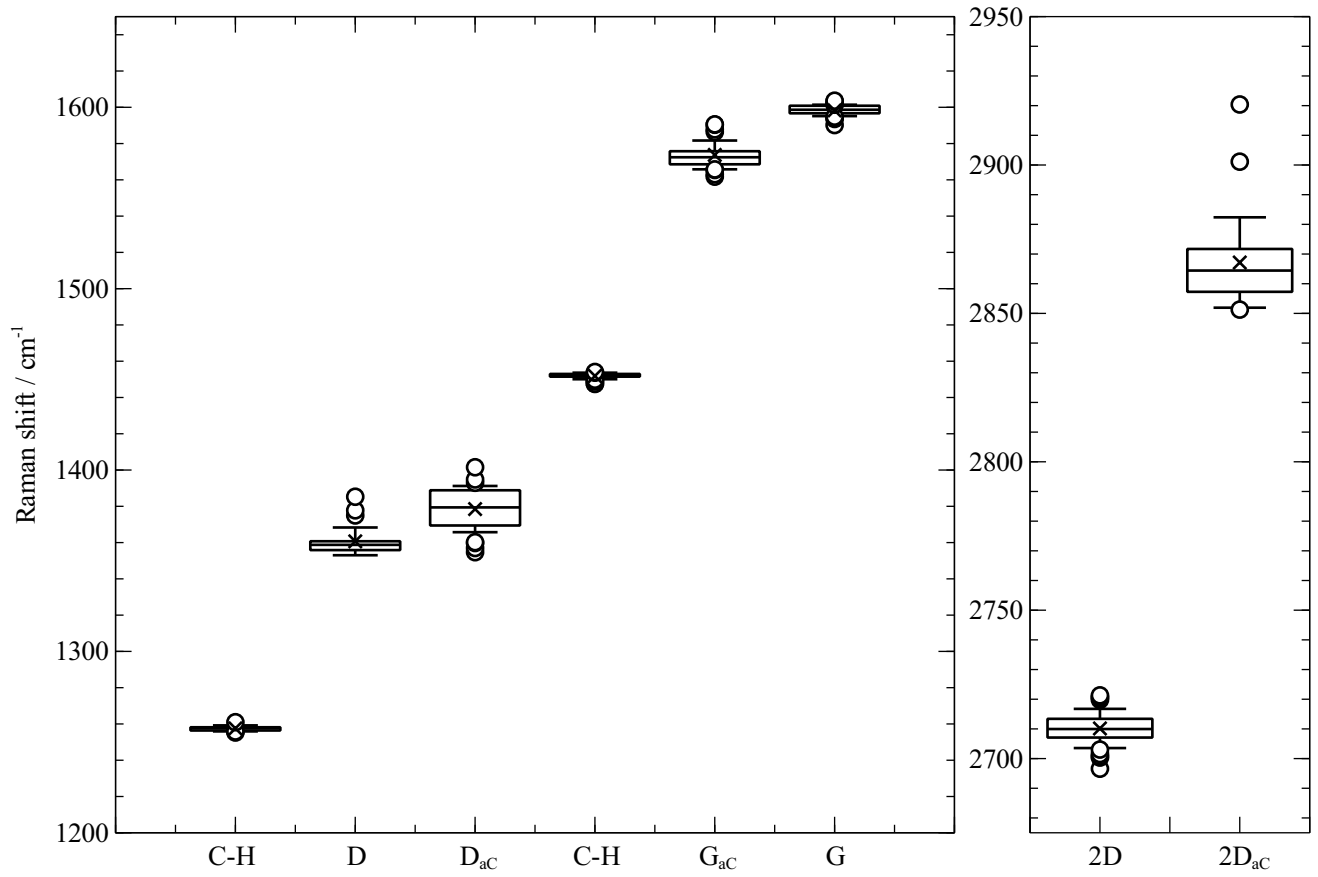

Figure S3: Statistical dispersion of Raman peak positions based on fitting of multiple ( $N = 24$ ) MoS<sub>2</sub>-on-graphene Raman spectra. Cross indicates mean position, box indicates the upper and lower quartiles, and the whiskers denote the standard deviation. Circles indicate outliers.

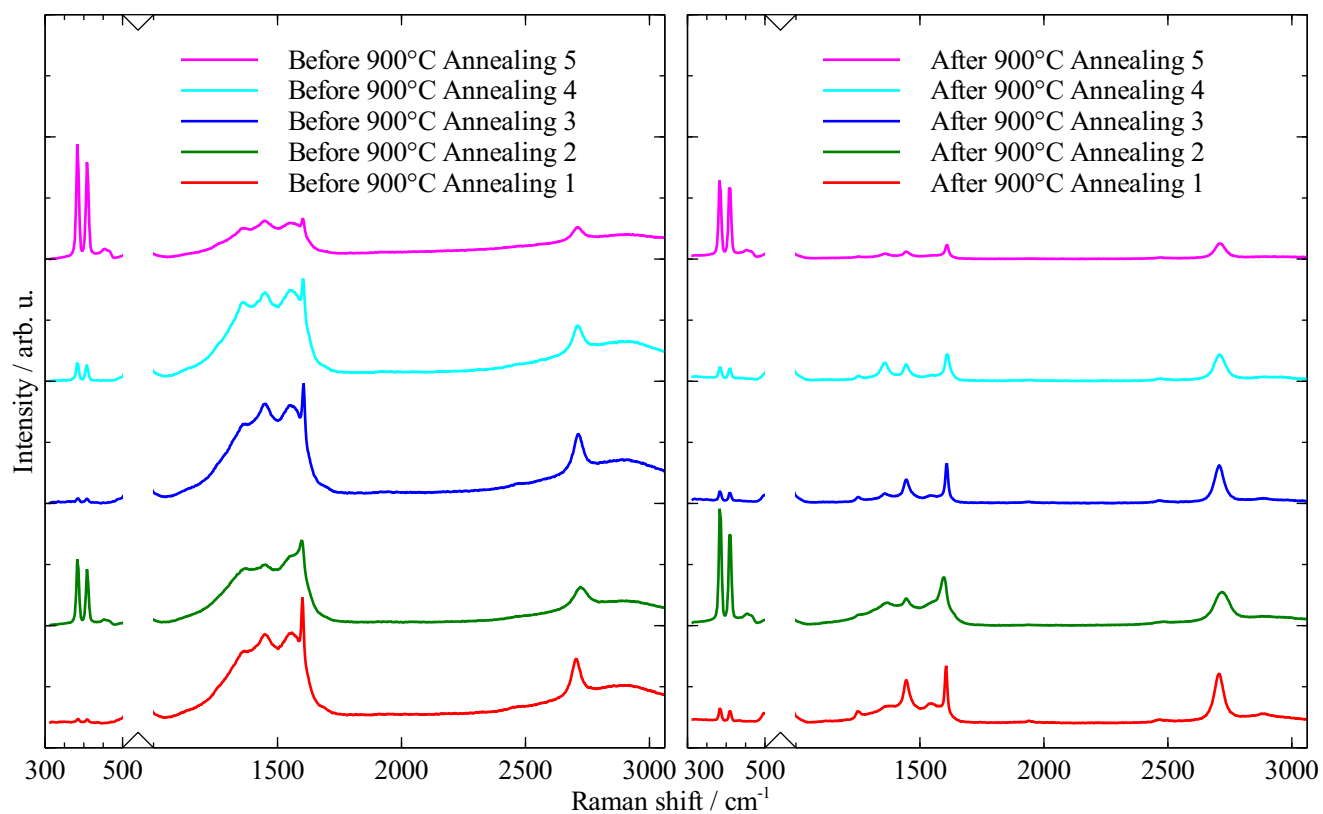

Figure S4: Left panel: Raman spectra of MoS<sub>2</sub> grown on graphene. Right panel: Raman spectra of MoS<sub>2</sub>-on-graphene after annealing in sulfur environment at 900 °C. Spectra in left and right panels were taken at the same positions.

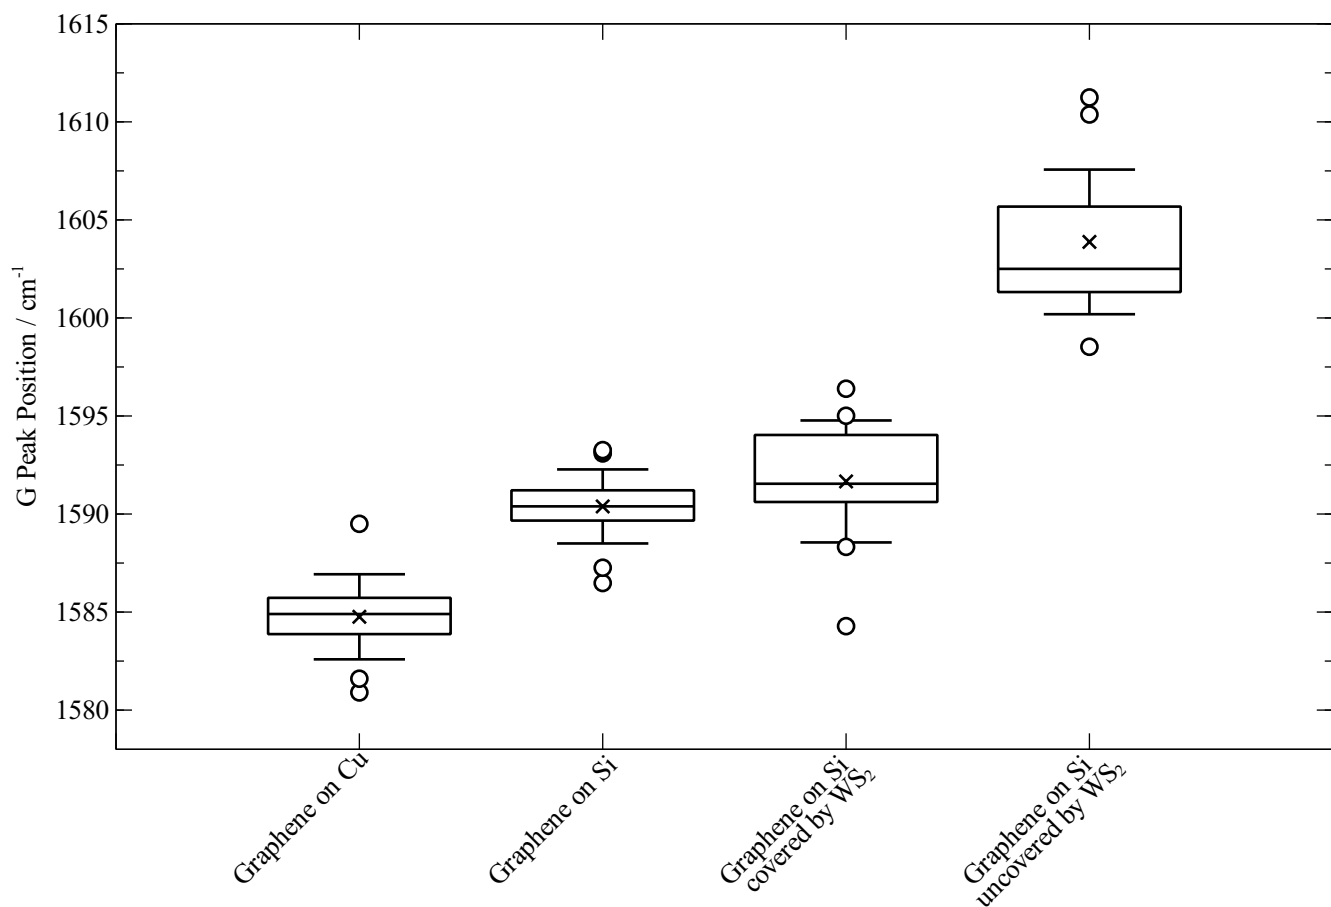

Figure S5: Box plot of Raman G peak position at different stages of WS<sub>2</sub>-on-graphene growth process. Upshift indicates doping level, which is significant for graphene after WS<sub>2</sub> CVD, but not covered by WS<sub>2</sub>.  $N = 12$

The graphene G peak shifts when doping level in graphene increases. Therefore, the G peak position can be used to determine the doping level of graphene qualitatively. These spectra show graphene is more p-doped after transfer from copper to silicon substrate. However, the doping level of WS<sub>2</sub>-covered graphene after CVD of WS<sub>2</sub> is only slightly higher than graphene transferred onto silicon. The doping level of graphene not covered by WS<sub>2</sub> after CVD is much higher than the graphene covered by WS<sub>2</sub>.

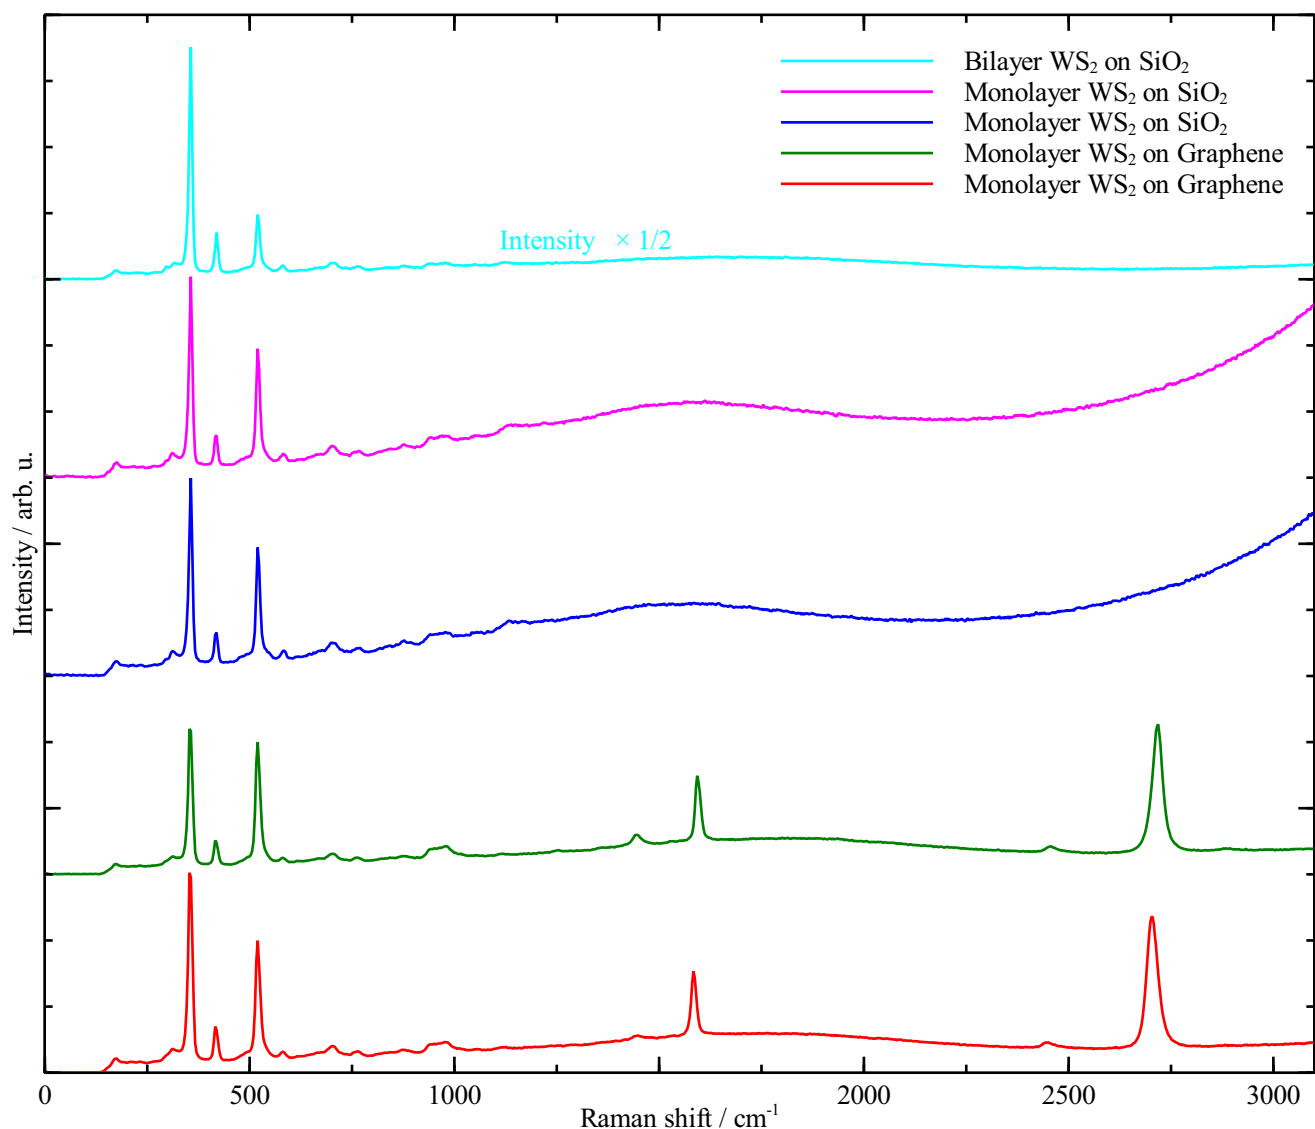

Figure S6: Onset of fluorescence tail near  $3000\text{ cm}^{-1}$  offer additional evidence that identification of monolayer  $\text{WS}_2$  is correct.

The origin of fluorescence tail is the direct band gap in monolayer (ML)  $\text{WS}_2$ . Because there is an energy difference between the  $488\text{ nm}$  laser source and the ML  $\text{WS}_2$  band gap, a broad fluorescence peak can be generated around  $4700\text{ cm}^{-1}$ . The tail of this peak can be found seen near  $3000\text{ cm}^{-1}$  in Raman spectra.

Emission is quenched in bilayer  $\text{WS}_2$  on silicon, because the direct band gap in ML  $\text{WS}_2$  is replaced by an indirect band gap. Emission is also quenched for ML  $\text{WS}_2$  on graphene, due to the fast charge transfer to graphene.<sup>[S1]</sup>

## References

[S1] J. He, N. Kumar, M. Z. Bellus, H.-Y. Chiu, D. He, Y. Wang, H. Zhao. *Nat Commun* **2014**, 5 5622.
